# Supplementary material
Source: Springer Nature journal article supplement (https://www.springermedizin.de/resource/supplementary/13024_2011_340_MOESM3_ESM.pdf/9643758)
Supplement: MOESM3 [file 9643758]

### Cohort 3

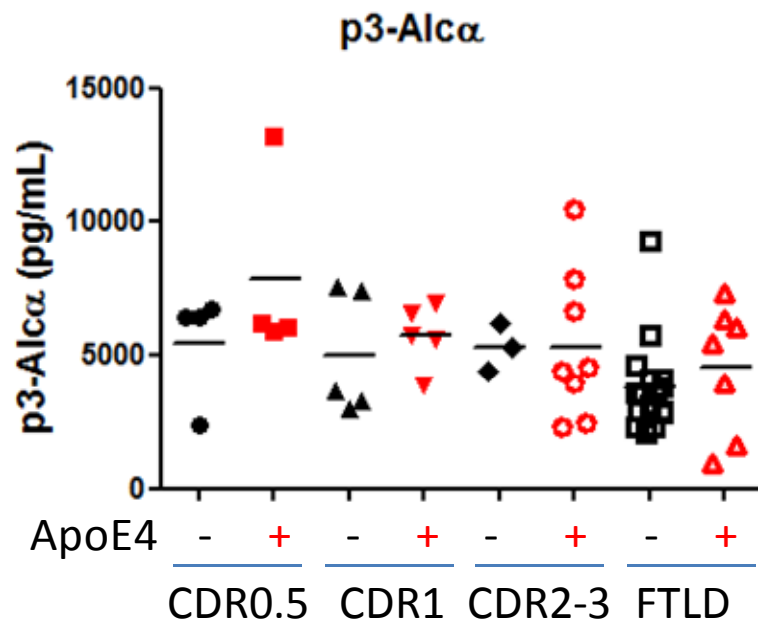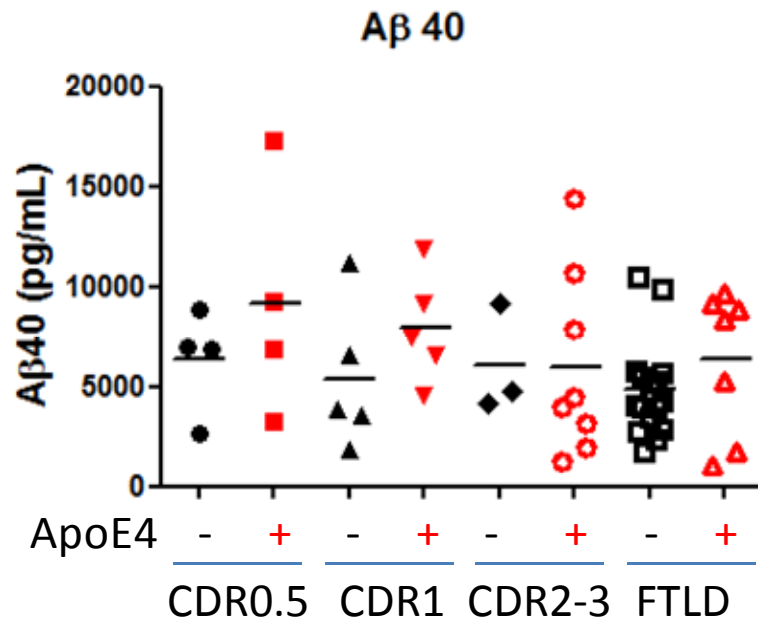

Figure S2
